# Supplementary material for: Photoelectrochemical Selective Oxidation of Glycerol to Glyceraldehyde with Bi-Based Metal–Organic-Framework-Decorated WO3 Photoanode
Source: MDPI journal article supplement (doi:10.3390/nano13101690), 2023-05-21
Supplement: s1 [file s1]

## Supporting Information

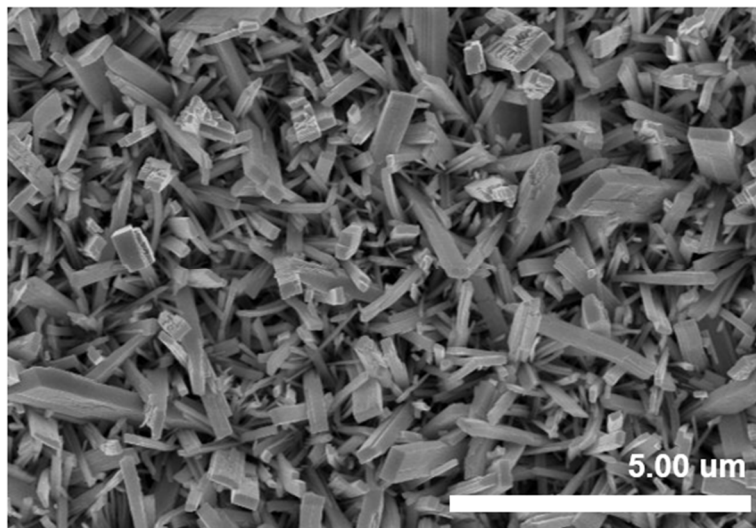

**Figure S1.** Top-view SEM images of WO<sub>3</sub> on FTO.

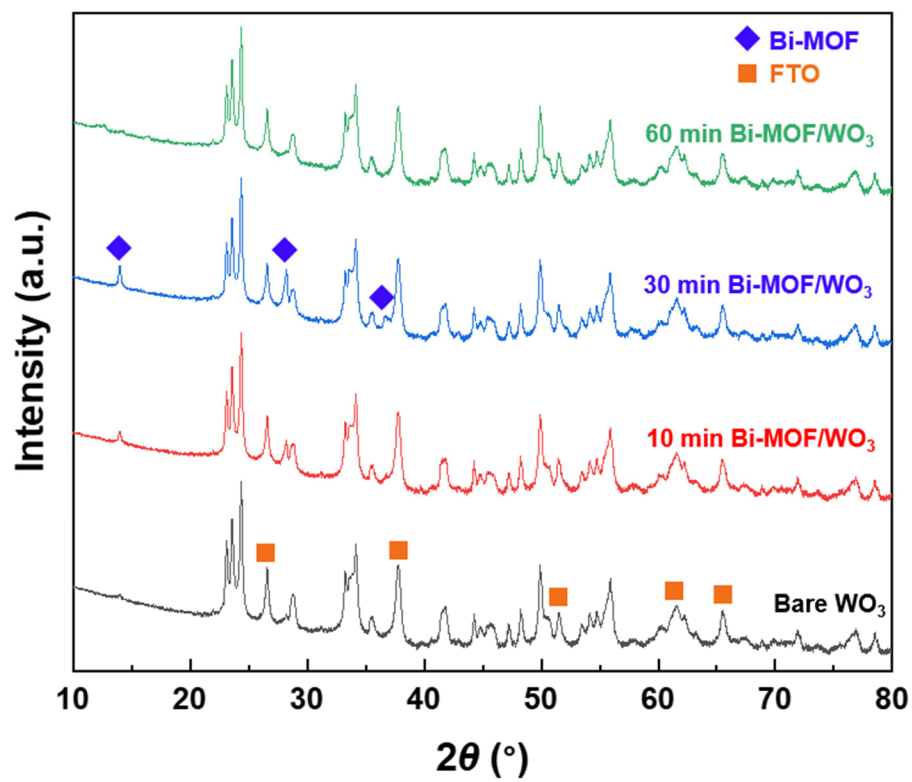

**Figure S2.** Out-of-plane  $\theta$ - $2\theta$  scans of Bi-MOF/ $\text{WO}_3$  at different synthesis times of MOF.

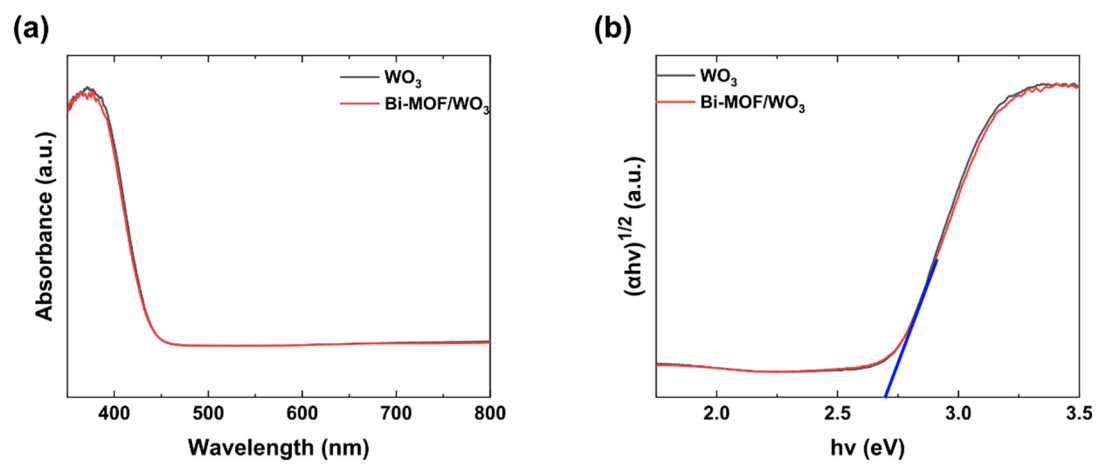

**Figure S3.** (a) UV-vis absorbance spectra, (b) Tauc plot

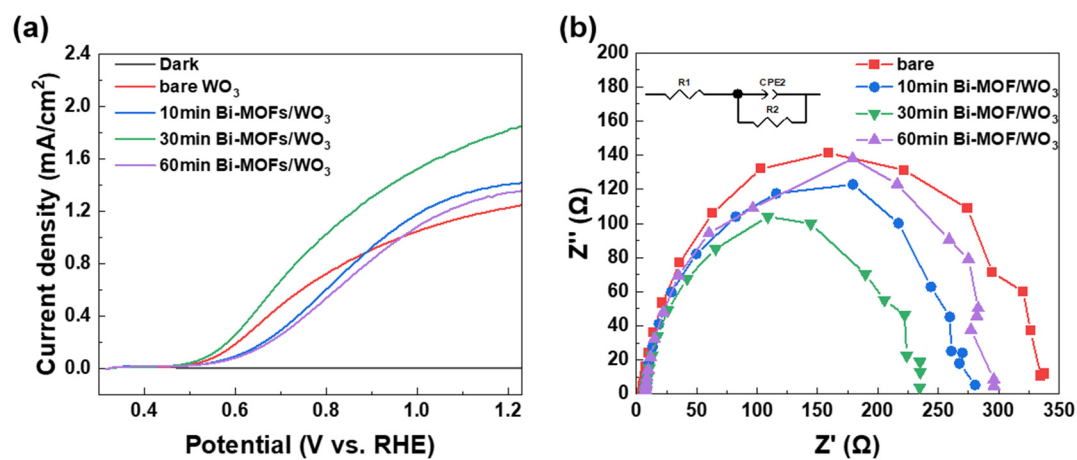

**Figure S4.** PEC performance of  $\text{WO}_3$  and Bi-MOF/ $\text{WO}_3$  in 0.5 M  $\text{Na}_2\text{SO}_4$  electrolytes, with pH adjusted to 2 using sulfuric acid, with 0.1 M glycerol. (a) LSV polarization curves, (b) Nyquist plots with different synthesis times of MOF.

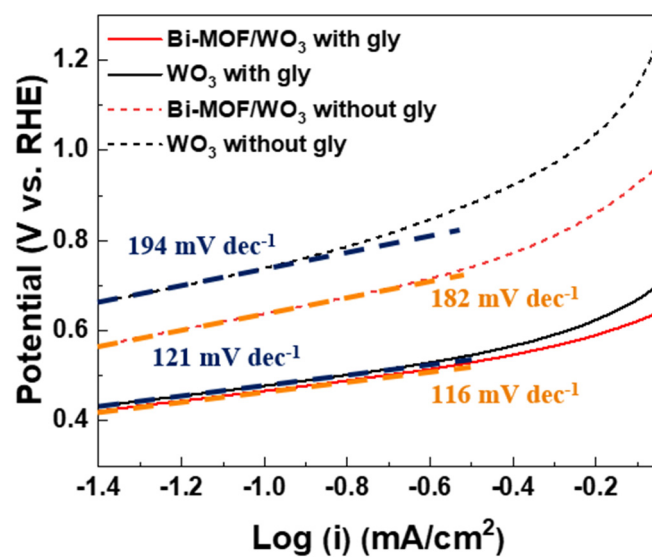

**Figure S5.** Tafel plots of WO<sub>3</sub> and Bi-MOF/WO<sub>3</sub> in 0.5 M Na<sub>2</sub>SO<sub>4</sub> electrolytes, with pH adjusted to 2 using sulfuric acid, with and without 2 M glycerol.

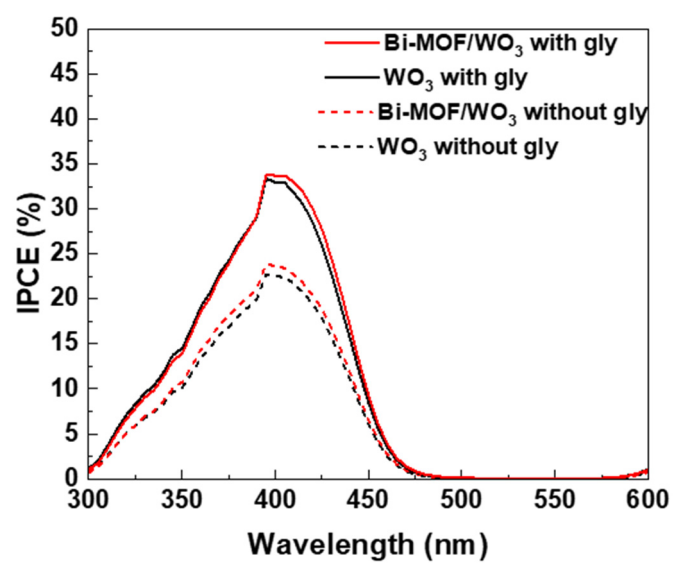

Figure S6. IPCE values at 1.2 V vs. RHE with 2 M glycerol.

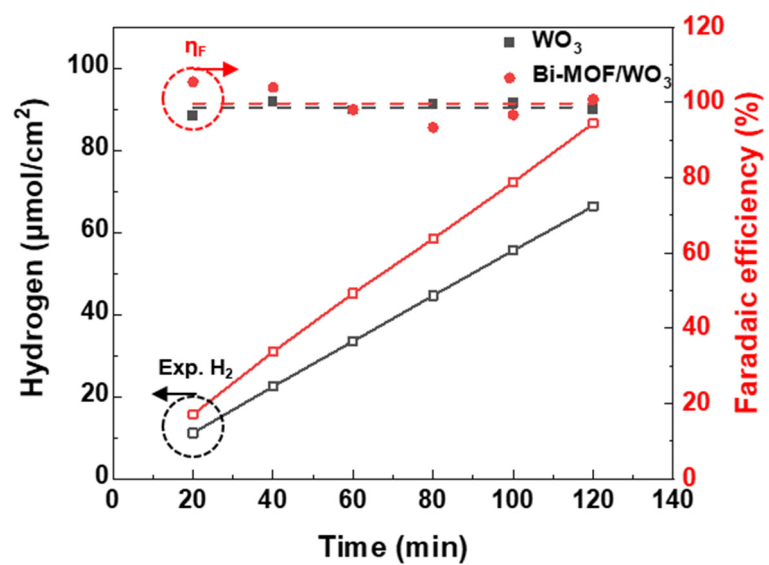

**Figure S7.** Faradaic efficiency and production rate of hydrogen at 1.2 V vs. RHE

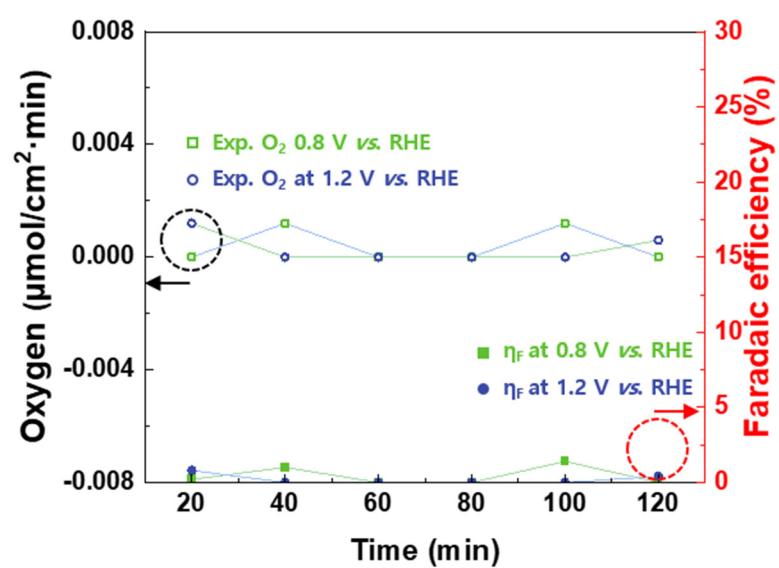

**Figure S8.** Faradaic efficiency and production rate of oxygen.



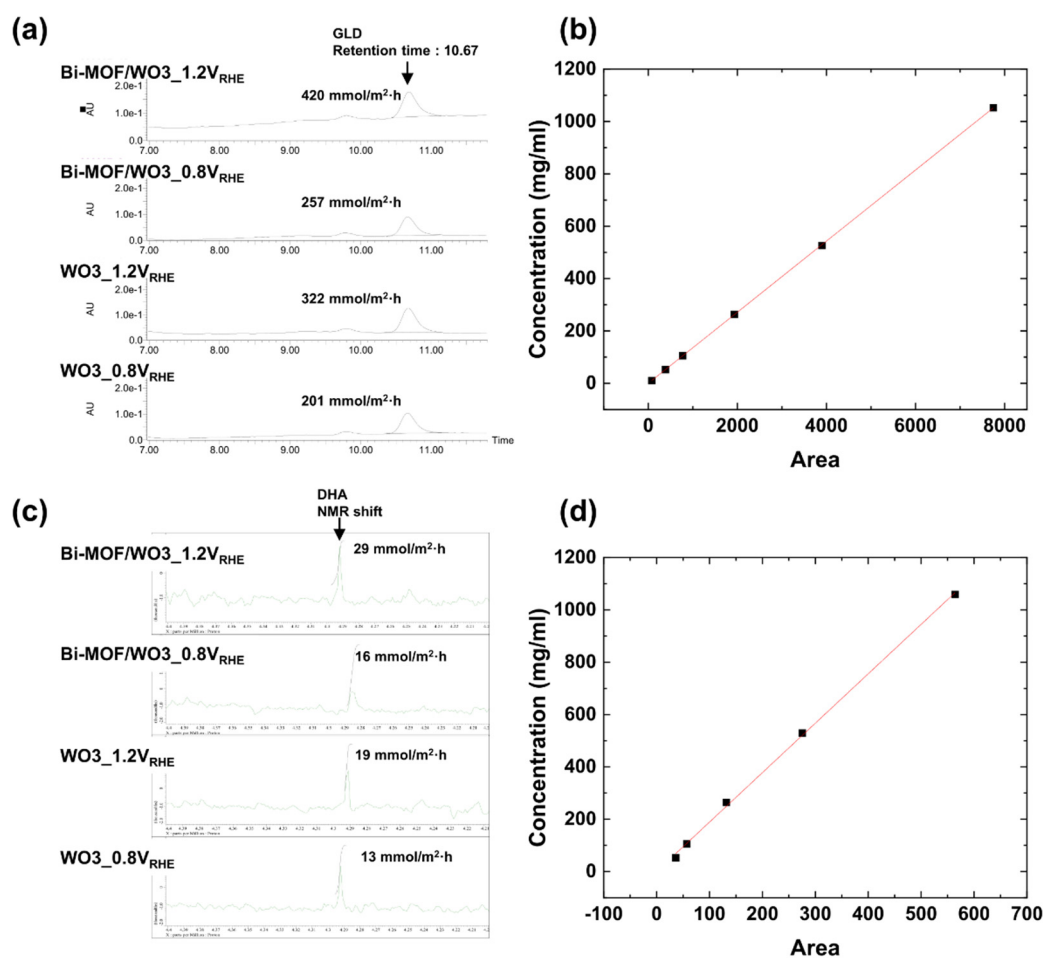

**Figure S9.** (a) Liquid chromatography of produced glyceraldehyde, (b) calibration curve of standard glyceraldehyde (c) NMR spectra of produced dihydroxyacetone, (d) calibration curve of standard dihydroxyacetone.

**Table S1. Reaction rate, production rate, and faradaic efficiency from WO<sub>3</sub> and Bi-MOF/WO<sub>3</sub>.**

| Electrode              | Applied potential (V <sub>RHE</sub> ) | Glycerol                                                      | Glyceraldehyde                                                |                         | Dihydroxyacetone                                              |                         |
|------------------------|---------------------------------------|---------------------------------------------------------------|---------------------------------------------------------------|-------------------------|---------------------------------------------------------------|-------------------------|
|                        |                                       | Conversion rate (mmol/m <sup>2</sup> , μmol/cm <sup>2</sup> ) | Production rate (mmol/m <sup>2</sup> , μmol/cm <sup>2</sup> ) | Faradaic efficiency (%) | Production rate (mmol/m <sup>2</sup> , μmol/cm <sup>2</sup> ) | Faradaic efficiency (%) |
| WO <sub>3</sub>        | 0.8                                   | 215                                                           | 201                                                           | 94                      | 13                                                            | 6                       |
|                        |                                       | 21.5                                                          | 20.1                                                          |                         | 1.3                                                           |                         |
| WO <sub>3</sub>        | 1.2                                   | 356                                                           | 322                                                           | 90                      | 19                                                            | 5                       |
|                        |                                       | 35.6                                                          | 32.2                                                          |                         | 1.9                                                           |                         |
| Bi-MOF/WO <sub>3</sub> | 0.8                                   | 278                                                           | 257                                                           | 93                      | 17                                                            | 6                       |
|                        |                                       | 27.8                                                          | 25.7                                                          |                         | 1.7                                                           |                         |
| Bi-MOF/WO <sub>3</sub> | 1.2                                   | 467                                                           | 420                                                           | 90                      | 29                                                            | 6                       |
|                        |                                       | 46.7                                                          | 42.0                                                          |                         | 2.9                                                           |                         |

**Table S2. Photocatalyst, and photoelectrode for the selective oxidation of glycerol.**

| <b>Material</b>                                    | <b>Medium (total volume)</b>                                                           | <b>Time</b> | <b>Major product</b> | <b>FE (%)</b> | <b>Selectivity (%)</b> | <b>Ref.</b>      |
|----------------------------------------------------|----------------------------------------------------------------------------------------|-------------|----------------------|---------------|------------------------|------------------|
| <b>BiVO<sub>4</sub></b>                            | <b>0.1 M glycerol, 0.5 M Na<sub>2</sub>SO<sub>4</sub></b>                              | <b>1 h</b>  | <b>DHA</b>           | <b>50</b>     | <b>50</b>              | <b>[40]</b>      |
| <b>BiVO<sub>4</sub></b>                            | <b>0.1 M glycerol, 0.1 M NaBi</b>                                                      | <b>2 h</b>  | <b>DHA</b>           | <b>-</b>      | <b>60</b>              | <b>[41]</b>      |
| <b>Ag/LDH/TiO<sub>2</sub></b>                      | <b>0.1 M glycerol, 0.5 M Na<sub>2</sub>SO<sub>4</sub></b>                              | <b>4 h</b>  | <b>DHA</b>           | <b>55</b>     | <b>72</b>              | <b>[87]</b>      |
| <b>Bi<sub>2</sub>O<sub>3</sub>/TiO<sub>2</sub></b> | <b>0.1 M glycerol, 0.5 M Na<sub>2</sub>SO<sub>4</sub>, H<sub>2</sub>SO<sub>4</sub></b> | <b>1h</b>   | <b>DHA</b>           | <b>62</b>     | <b>75</b>              | <b>[88]</b>      |
| <b>TiO<sub>2</sub></b>                             | <b>10 mM glycerol, 20 mM Na<sub>2</sub>SO<sub>4</sub></b>                              | <b>4 h</b>  | <b>GAD</b>           | <b>-</b>      | <b>44</b>              | <b>[89]</b>      |
| <b>H-WO<sub>3</sub>/TiO<sub>2</sub></b>            | <b>Na<sub>2</sub>SO<sub>4</sub>, NaBi,</b>                                             | <b>1 h</b>  | <b>GAD</b>           | <b>51</b>     | <b>56</b>              | <b>[90]</b>      |
| <b>WO<sub>3</sub></b>                              | <b>1 M glycerol, 0.1 M Na<sub>2</sub>SO<sub>4</sub></b>                                | <b>2 h</b>  | <b>GAD</b>           | <b>75</b>     | <b>80</b>              | <b>[91]</b>      |
| <b>Bi-MOF/WO<sub>3</sub></b>                       | <b>2 M glycerol, 0.5 M Na<sub>2</sub>SO<sub>4</sub>,</b>                               | <b>1 h</b>  | <b>GAD</b>           | <b>93</b>     | <b>94</b>              | <b>This work</b> |
